# Supplementary material
Source: PubMed Central journal article supplement (PMC6585427)
Supplement: NIHMS1508570-supplement-4.pdf [file NIHMS1508570-supplement-4.pdf]

# Supplementary File

I. VISUALIZATION OF WORD EMBEDDINGS.
